# Supplementary material
Source: PubMed Central journal article supplement (PMC9377750)

Figure S4. Detailed CD8<sup>+</sup> T cell Compartment Interrogation.

### Detailed CD8<sup>+</sup> T cell compartment interrogation in paired sample P1

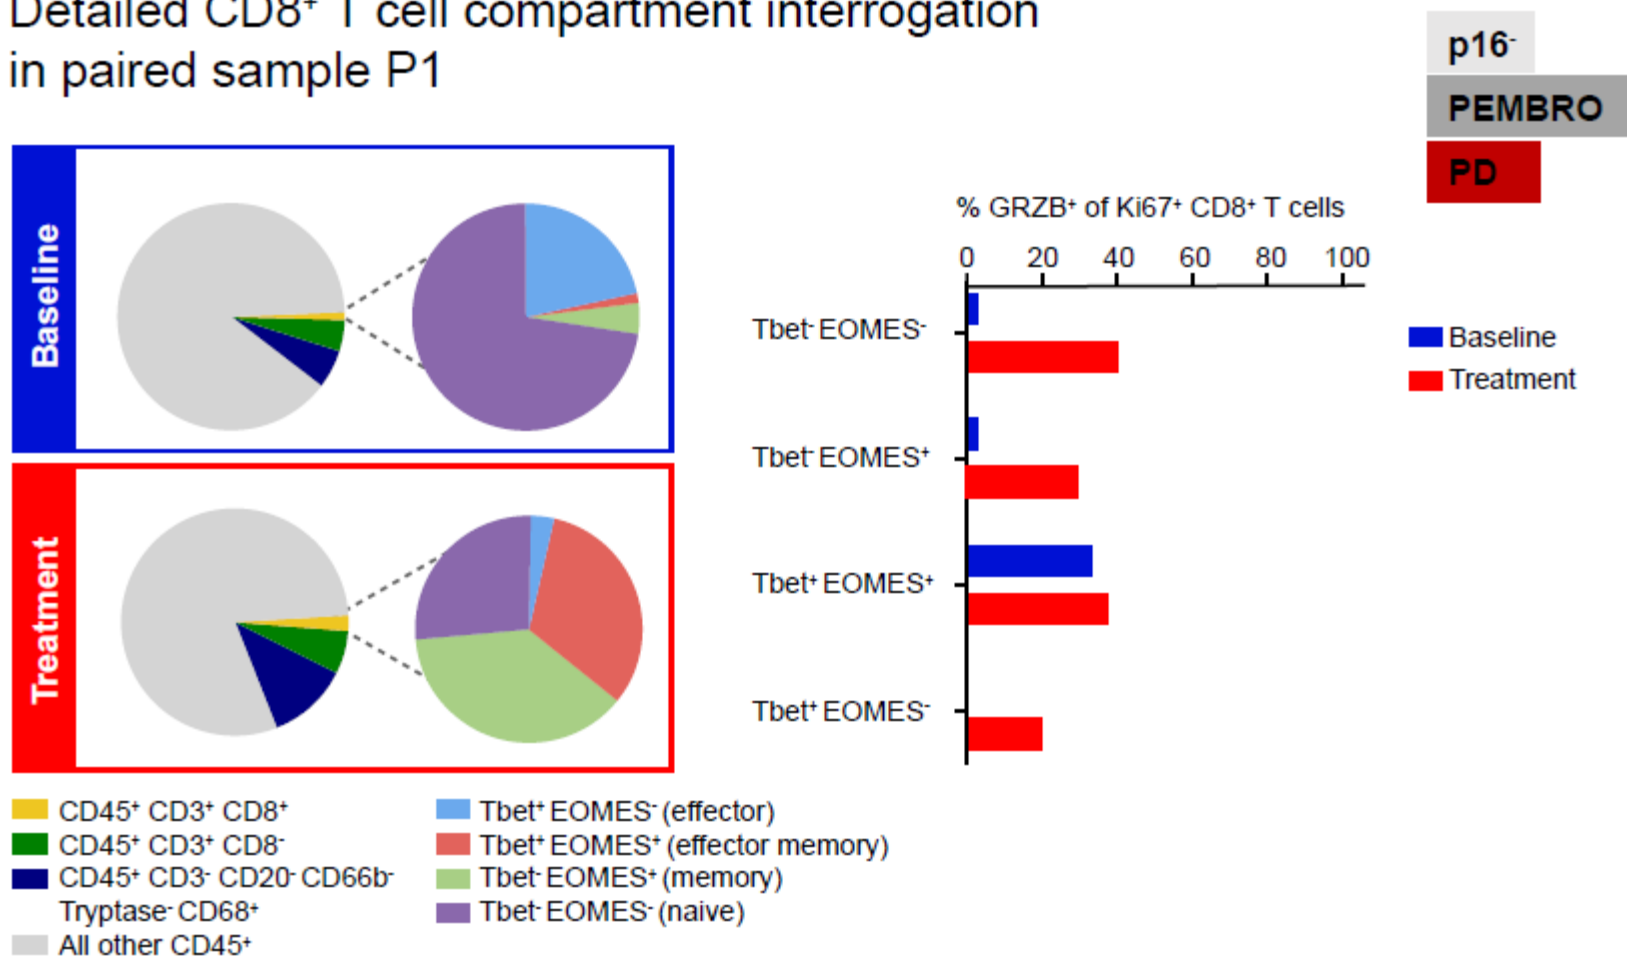

# Detailed CD8<sup>+</sup> T cell compartment interrogation in paired sample P2

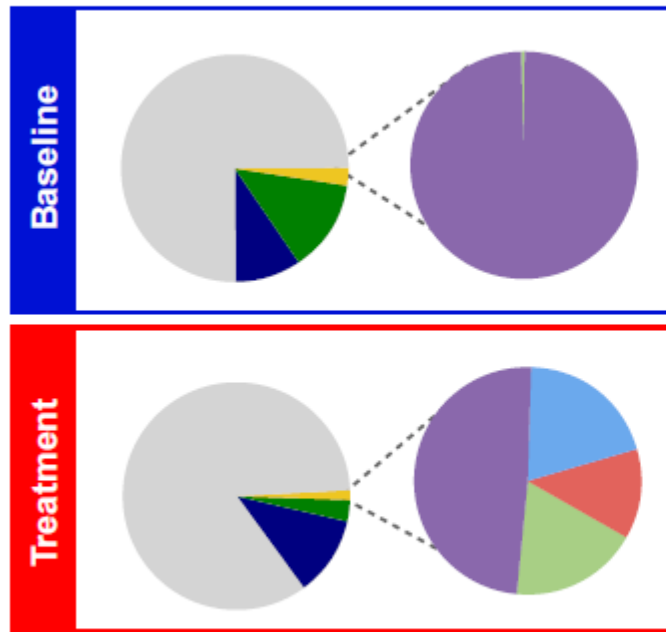

- CD45<sup>+</sup> CD3<sup>+</sup> CD8<sup>+</sup>
- CD45<sup>+</sup> CD3<sup>+</sup> CD8<sup>-</sup>
- CD45<sup>+</sup> CD3<sup>-</sup> CD20<sup>-</sup> CD66b<sup>-</sup> Tryptase<sup>-</sup> CD68<sup>+</sup>
- All other CD45<sup>+</sup>
- Tbet<sup>+</sup> EOMES<sup>-</sup> (effector)
- Tbet<sup>+</sup> EOMES<sup>+</sup> (effector memory)
- Tbet<sup>-</sup> EOMES<sup>+</sup> (memory)
- Tbet<sup>-</sup> EOMES<sup>-</sup> (naive)

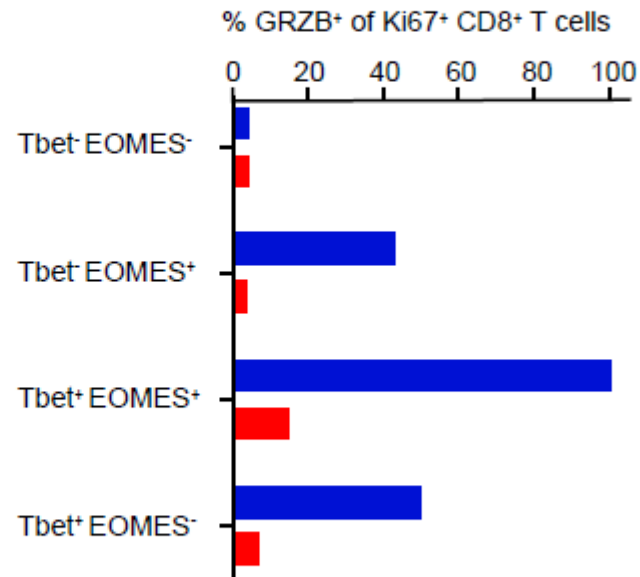

p16<sup>-</sup>

**PEMBRO + Acalabrutinib**

PD

■ Baseline

■ Treatment

# Detailed CD8<sup>+</sup> T cell compartment interrogation in paired sample P3

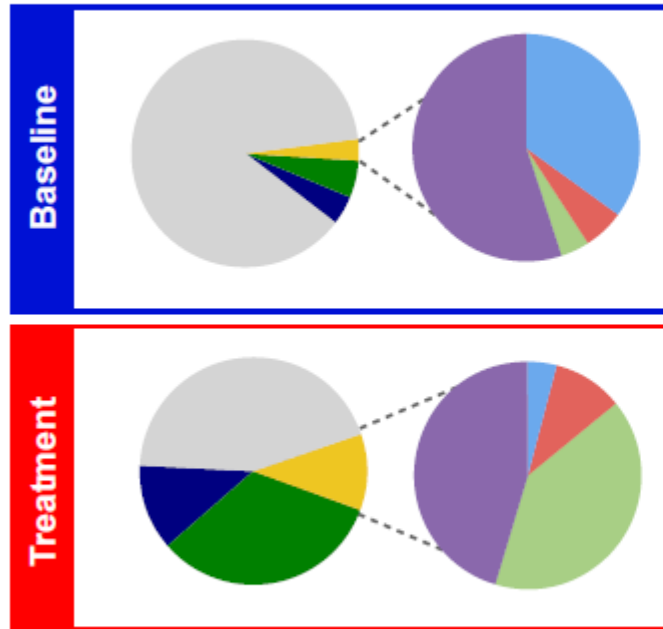

- CD8<sup>+</sup> T cells
- Tbet<sup>+</sup> EOMES<sup>-</sup> (effector)
- CD4<sup>+</sup> T cells
- Tbet<sup>+</sup> EOMES<sup>+</sup> (effector memory)
- CD68<sup>+</sup> myelomonocytic
- Tbet<sup>-</sup> EOMES<sup>+</sup> (memory)
- Other CD45<sup>+</sup> cells
- Tbet<sup>-</sup> EOMES<sup>-</sup> (naive)

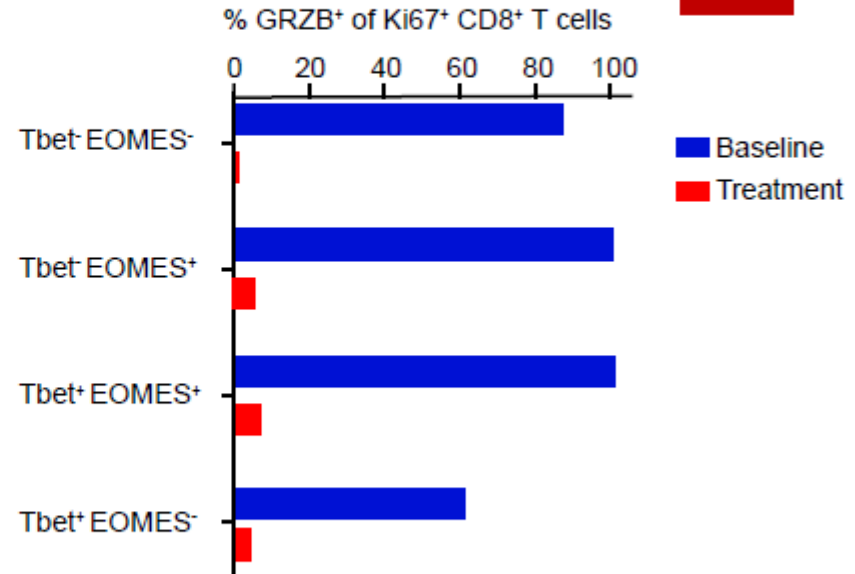

p16<sup>+</sup>

PEMBRO

PD

Baseline

Treatment

# Detailed CD8<sup>+</sup> T cell compartment interrogation in paired sample P4

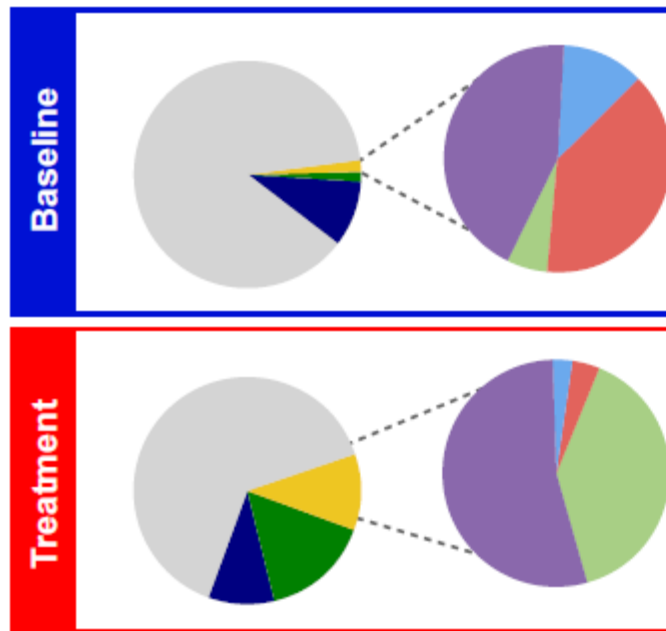

- CD8<sup>+</sup> T cells
- Tbet<sup>+</sup> EOMES<sup>-</sup> (effector)
- CD4<sup>+</sup> T cells
- Tbet<sup>+</sup> EOMES<sup>+</sup> (effector memory)
- CD68<sup>+</sup> myelomonocytic
- Tbet EOMES<sup>+</sup> (memory)
- Other CD45<sup>+</sup> cells
- Tbet EOMES<sup>-</sup> (naive)

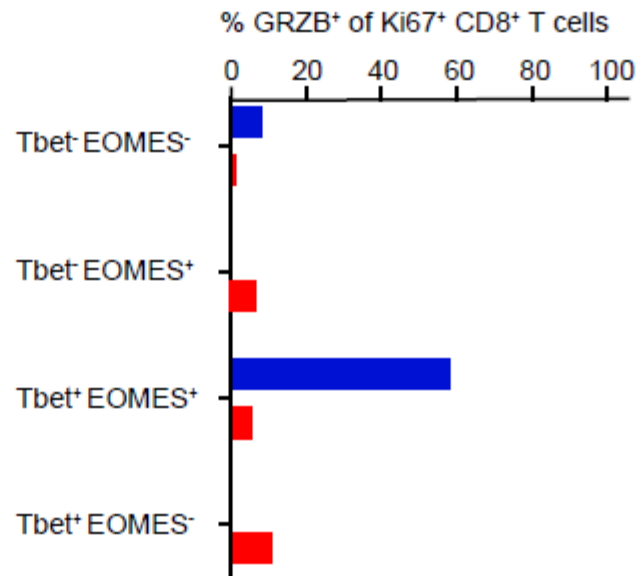

p16<sup>-</sup>

**PEMBRO + Acalabrutinib**

SD

■ Baseline

■ Treatment

# Detailed CD8<sup>+</sup> T cell compartment interrogation in paired sample P5

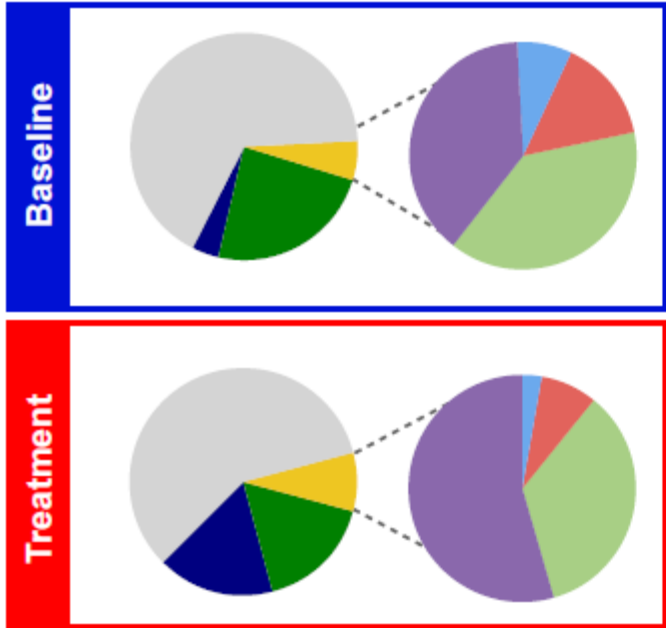

- CD45<sup>+</sup> CD3<sup>+</sup> CD8<sup>+</sup>
- CD45<sup>+</sup> CD3<sup>+</sup> CD8<sup>-</sup>
- CD45<sup>+</sup> CD3<sup>-</sup> CD20<sup>-</sup> CD66b<sup>-</sup> Tryptase<sup>-</sup> CD68<sup>+</sup>
- All other CD45<sup>+</sup>
- Tbet<sup>+</sup> EOMES<sup>-</sup> (effector)
- Tbet<sup>+</sup> EOMES<sup>+</sup> (effector memory)
- Tbet<sup>-</sup> EOMES<sup>+</sup> (memory)
- Tbet<sup>-</sup> EOMES<sup>-</sup> (naive)

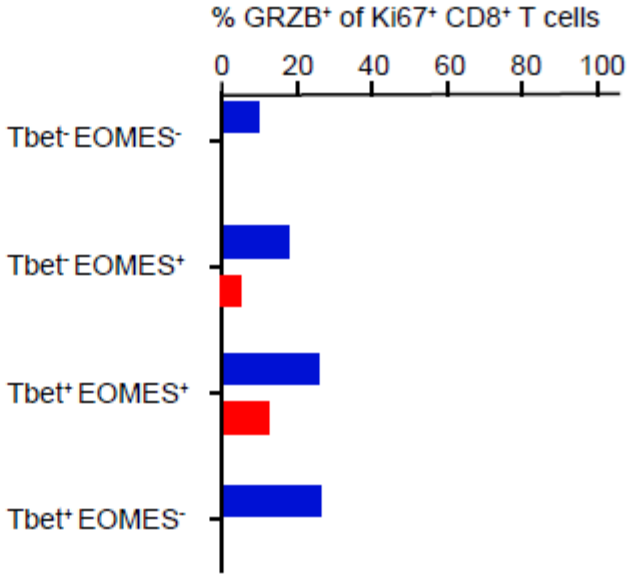

p16<sup>+</sup>

PEMBRO

PD

Baseline

Treatment

# Detailed CD8<sup>+</sup> T cell compartment interrogation in paired sample P6

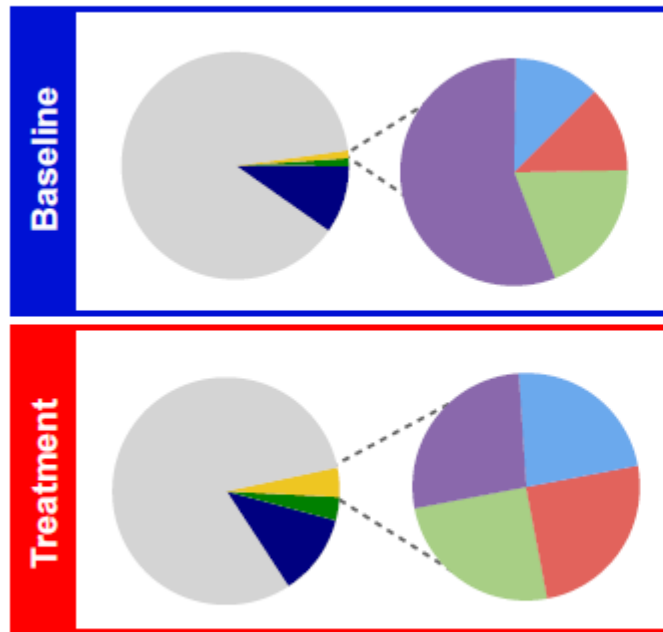

- CD45<sup>+</sup> CD3<sup>+</sup> CD8<sup>+</sup>
- CD45<sup>+</sup> CD3<sup>+</sup> CD8<sup>-</sup>
- CD45<sup>+</sup> CD3<sup>-</sup> CD20<sup>-</sup> CD66b<sup>-</sup>  
Tryptase<sup>-</sup> CD68<sup>+</sup>
- All other CD45<sup>+</sup>
- Tbet<sup>+</sup> EOMES<sup>-</sup> (effector)
- Tbet<sup>+</sup> EOMES<sup>+</sup> (effector memory)
- Tbet<sup>-</sup> EOMES<sup>+</sup> (memory)
- Tbet<sup>-</sup> EOMES<sup>-</sup> (naive)

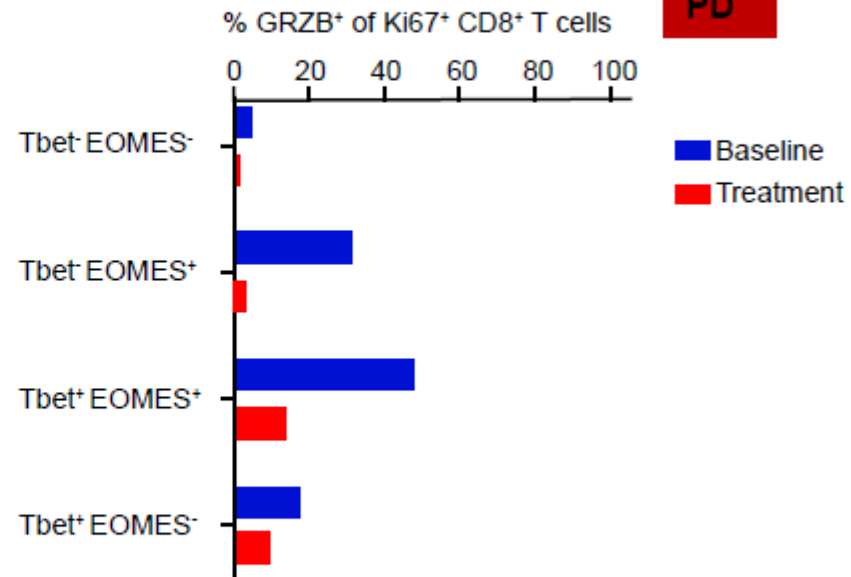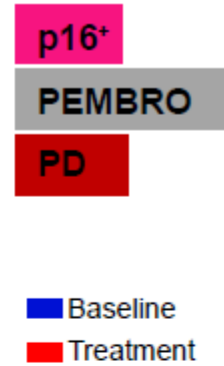

# Detailed CD8<sup>+</sup> T cell compartment interrogation in paired sample P9

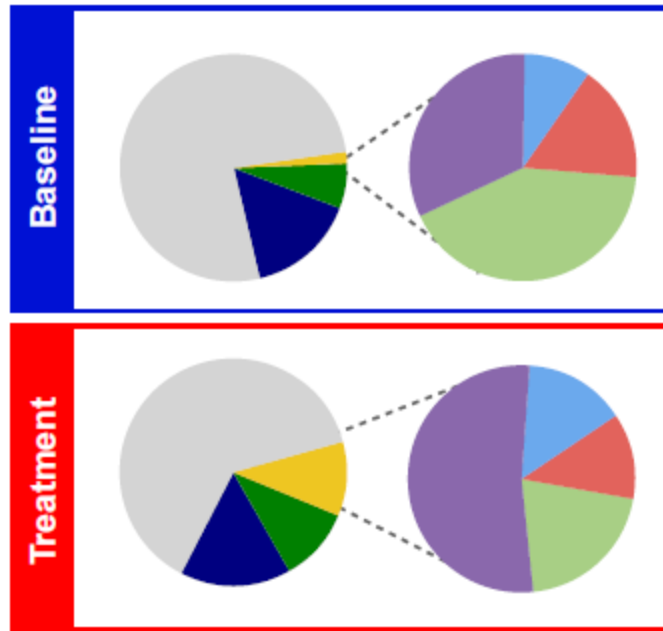

- CD45<sup>+</sup> CD3<sup>+</sup> CD8<sup>+</sup>
- CD45<sup>+</sup> CD3<sup>+</sup> CD8<sup>-</sup>
- CD45<sup>+</sup> CD3<sup>-</sup> CD20<sup>-</sup> CD66b<sup>-</sup> Tryptase<sup>-</sup> CD68<sup>+</sup>
- All other CD45<sup>+</sup>
- Tbet<sup>+</sup> EOMES<sup>-</sup> (effector)
- Tbet<sup>+</sup> EOMES<sup>+</sup> (effector memory)
- Tbet<sup>-</sup> EOMES<sup>+</sup> (memory)
- Tbet<sup>-</sup> EOMES<sup>-</sup> (naive)

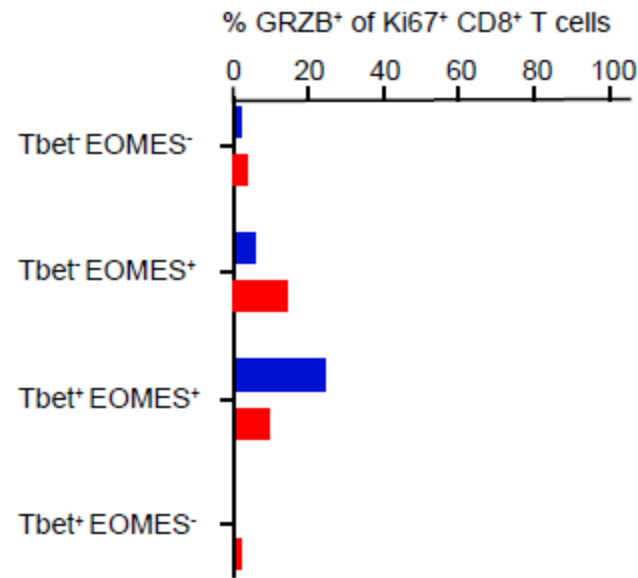

p16<sup>+</sup>  
PEMBRO  
PD

■ Baseline  
■ Treatment

## Detailed CD8<sup>+</sup> T cell compartment interrogation in paired sample P7 and P10 (baseline only)

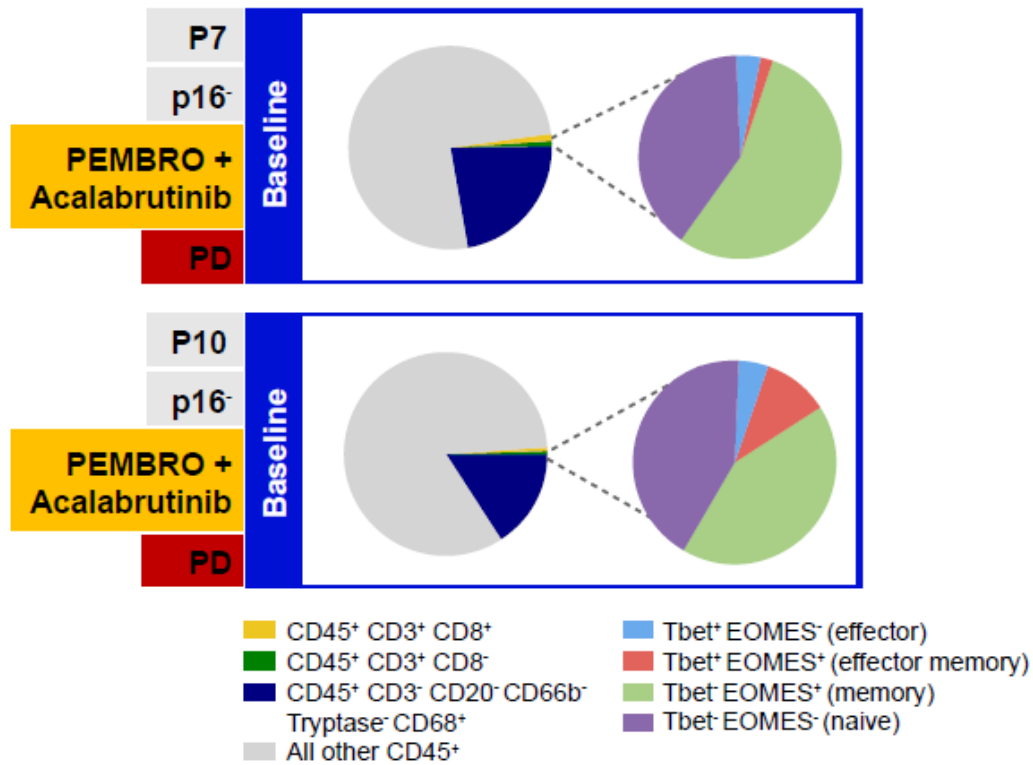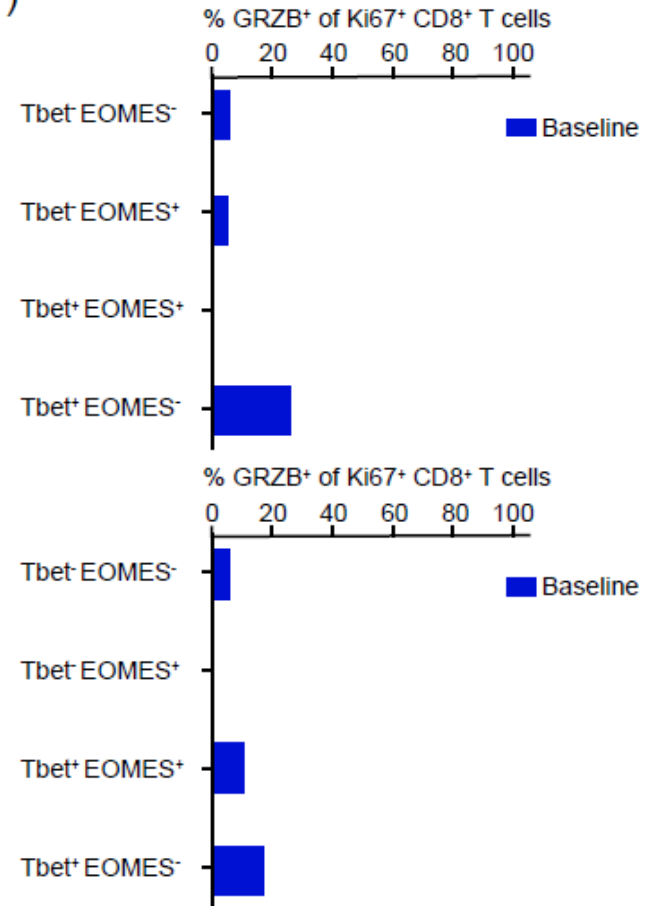

Supplement: ccr-21-2547_figure_s4_supps4.pdf [file ccr-21-2547_figure_s4_supps4.pdf]
