# Supplementary material
Source: PubMed Central journal article supplement (PMC9377750)
Supplement: ccr-21-2547_figure_s1_supps1.pdf [file ccr-21-2547_figure_s1_supps1.pdf]

## SUPPLEMENTAL FIGURES

**Figure S1. Hierarchical Image Cytometry Gating Strategies Using Multiplex Immunohistochemistry for Quantification of Immune Cell Populations. (A) myeloid antibody panel, (B) lymphoid antibody panel, and (C) functional antibody panel gating strategies. (D) Immune cell populations identified via gating strategies shown.**

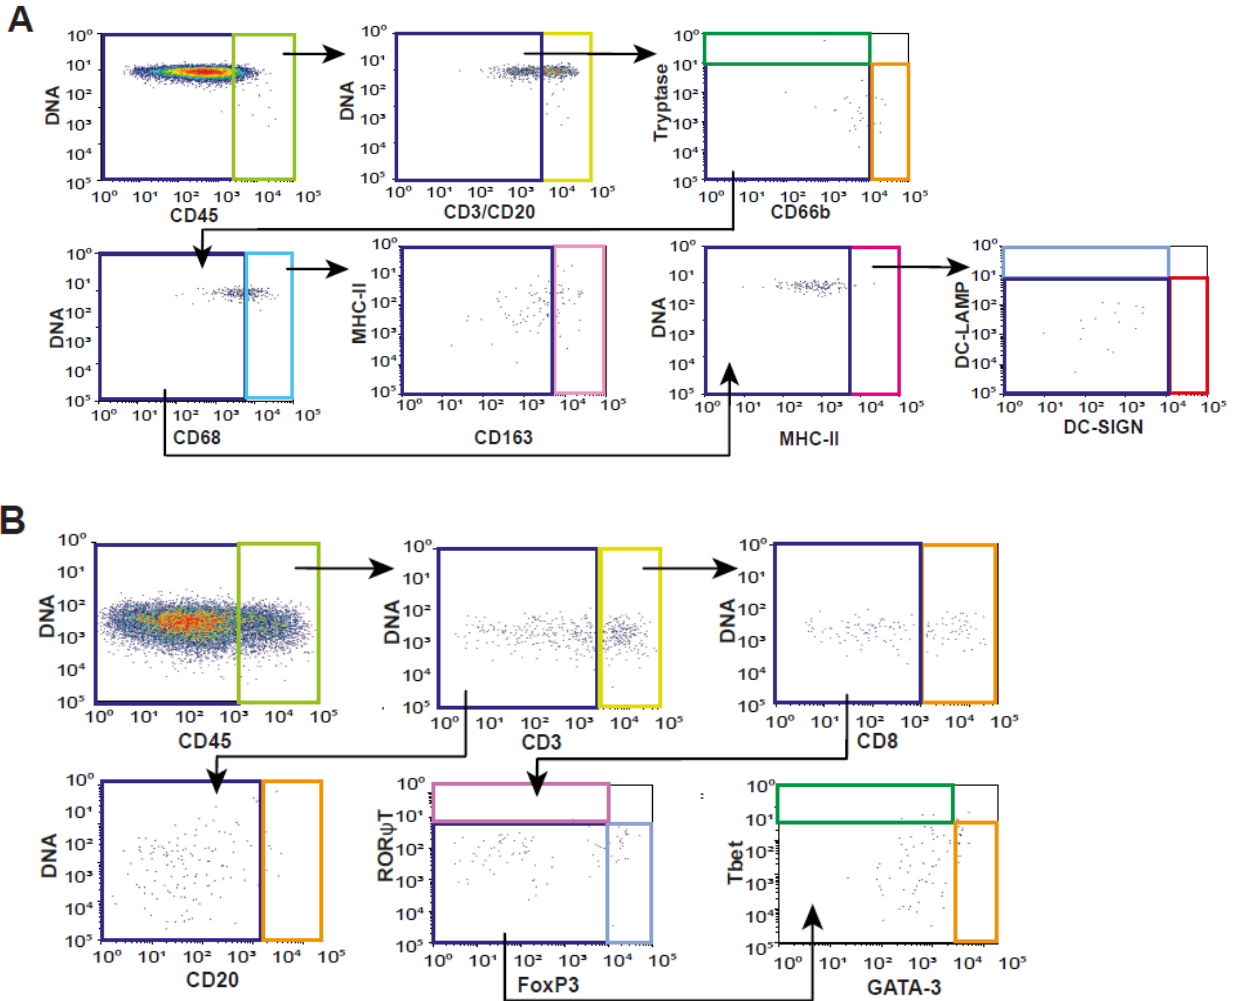

**C**

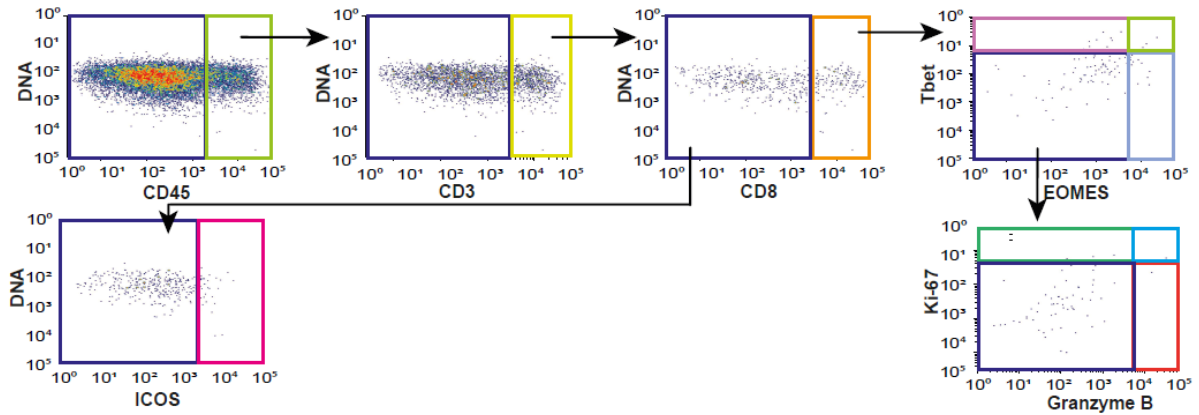

**D**

| Lineage                        | Identification                                                                                                                                                     |
|--------------------------------|--------------------------------------------------------------------------------------------------------------------------------------------------------------------|
| Th1 helper T cells             | CD45 <sup>+</sup> CD3 <sup>+</sup> CD8 <sup>+</sup> Tbet <sup>+</sup>                                                                                              |
| Th2 helper T cells             | CD45 <sup>+</sup> CD3 <sup>+</sup> CD4 <sup>+</sup> CD8 <sup>-</sup> GATA3 <sup>+</sup>                                                                            |
| Regulatory T cells (Treg)      | CD45 <sup>+</sup> CD3 <sup>+</sup> CD4 <sup>+</sup> CD8 <sup>-</sup> Foxp3 <sup>+</sup>                                                                            |
| Th17 helper T cells            | CD45 <sup>+</sup> CD3 <sup>+</sup> CD4 <sup>+</sup> CD8 <sup>-</sup> RORγt <sup>+</sup>                                                                            |
| Th0 (naïve) helper T cells     | CD45 <sup>+</sup> CD3 <sup>+</sup> CD4 <sup>+</sup> CD8 <sup>-</sup> Foxp3 <sup>-</sup> RORγt <sup>-</sup> Tbet <sup>-</sup> GATA3 <sup>-</sup>                    |
| CD8 <sup>+</sup> T lymphocytes | CD45 <sup>+</sup> CD3 <sup>+</sup> CD8 <sup>+</sup>                                                                                                                |
| CD20 <sup>+</sup> B cells      | CD45 <sup>+</sup> CD3 <sup>-</sup> CD20 <sup>+</sup>                                                                                                               |
| Granulocytes                   | CD45 <sup>+</sup> CD3/CD20 <sup>-</sup> CD66b <sup>+</sup>                                                                                                         |
| Mast cells                     | CD45 <sup>+</sup> CD3/CD20 <sup>-</sup> CD66b <sup>-</sup> Tryptase <sup>+</sup>                                                                                   |
| Macrophages+Monocytes          | CD45 <sup>+</sup> CD3/CD20 <sup>-</sup> CD66b <sup>-</sup> Tryptase <sup>-</sup> CD68 <sup>+</sup> CD163 <sup>+/-</sup>                                            |
| Immature DC                    | CD45 <sup>+</sup> CD3/CD20 <sup>-</sup> CD66b <sup>-</sup> Tryptase <sup>-</sup> CD68 <sup>-</sup> MHC-II <sup>+</sup> DC-LAMP <sup>-</sup> DC-SIGN <sup>-/+</sup> |
| Mature DC                      | CD45 <sup>+</sup> CD3/CD20 <sup>-</sup> CD66b <sup>-</sup> Tryptase <sup>-</sup> CD68 <sup>+</sup> MHC-II <sup>+</sup> DC-LAMP <sup>+</sup>                        |
| CD45 <sup>+</sup> other        | CD45 <sup>+</sup> CD3/CD20 <sup>-</sup> CD66b <sup>-</sup> Tryptase <sup>-</sup> CD68 <sup>-</sup> MHC-II <sup>-</sup>                                             |
| Proliferation                  | Ki67                                                                                                                                                               |
| Cytotoxicity                   | Granzyme B                                                                                                                                                         |
| Immune functionality           | EOMES, Tbet, ICOS                                                                                                                                                  |
