# Supplementary material
Source: PubMed Central journal article supplement (PMC9377750)

### Figure S3. TiME at Baseline and After Treatment.

(A) Percentages of total CD45 cells that were CD8<sup>+</sup>, (B) percentages of total CD45<sup>+</sup> cells that were granulocytes, (C) ratios of CD163<sup>-</sup> to CD163<sup>+</sup>CD68<sup>+</sup> monocytes/macrophages, and (D) percentages of total CD4<sup>+</sup> T cells that were positive for ICOS are shown for each patient at baseline and after 43 days of treatment. Pembrolizumab monotherapy, n=5; pembrolizumab plus acalabrutinib combination therapy, n=3 at baseline and n=2 at day 43. Green lines joining baseline and treatment paired samples reflect a >10% increase after treatment compared with baseline, red lines indicate a >10% decrease after treatment compared with baseline, and the black line (Panel B, right) indicates a change of <10% after treatment compared with baseline. ICOS, inducible co-stimulator; TiME, tumor-immune microenvironment.

# A

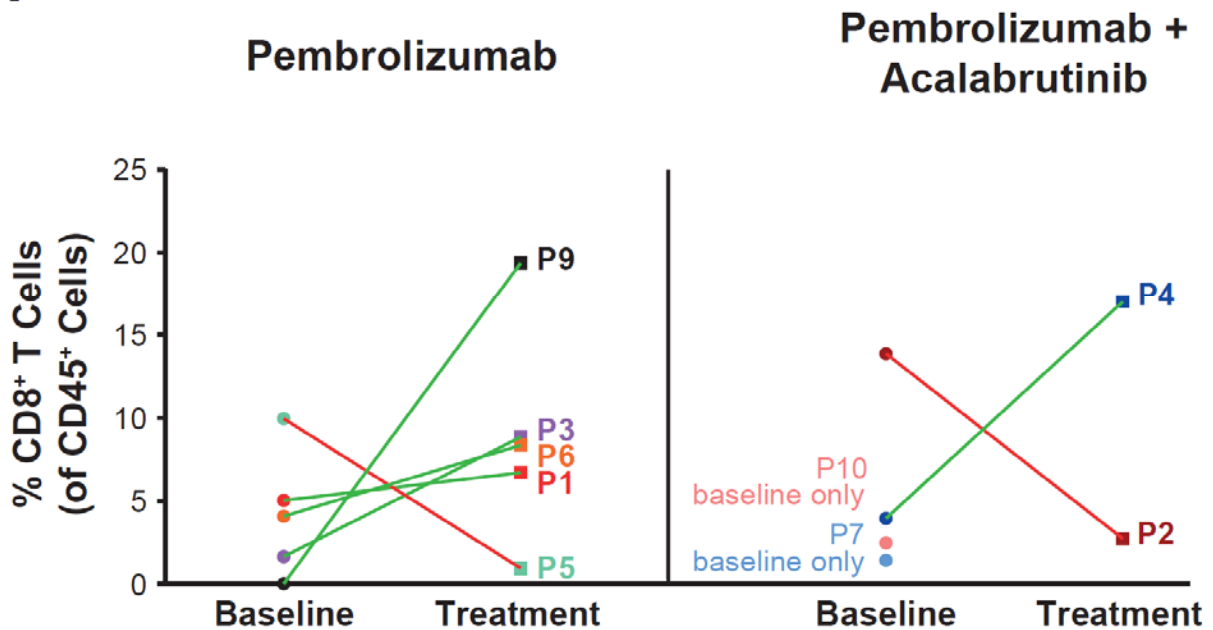

**B**

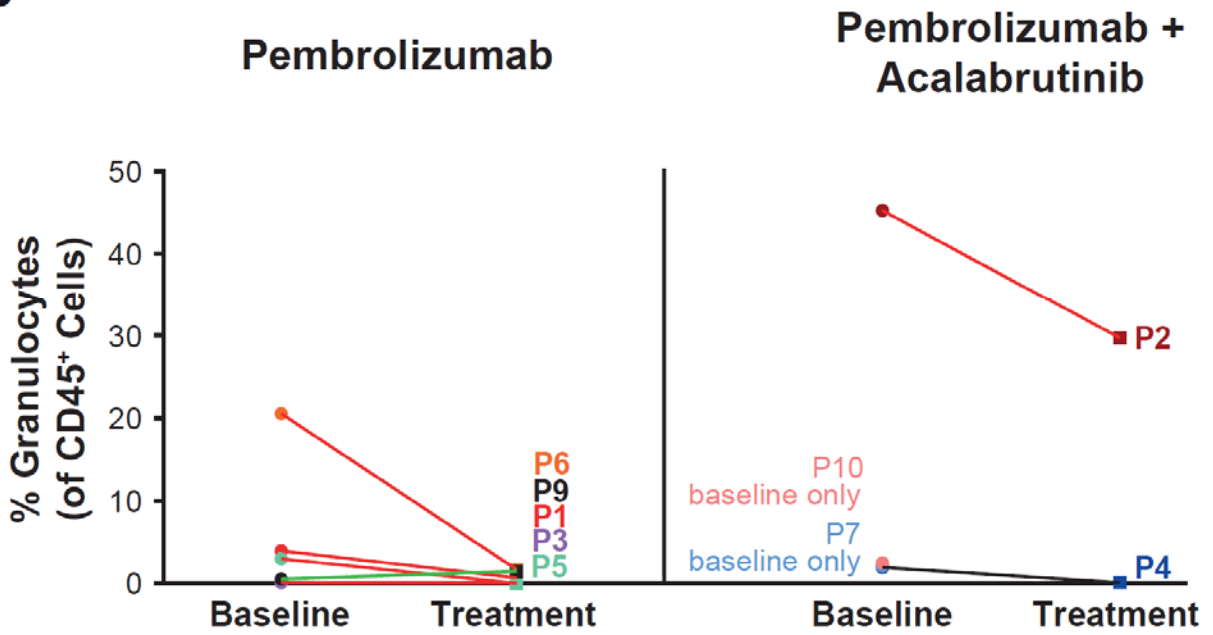

**C**

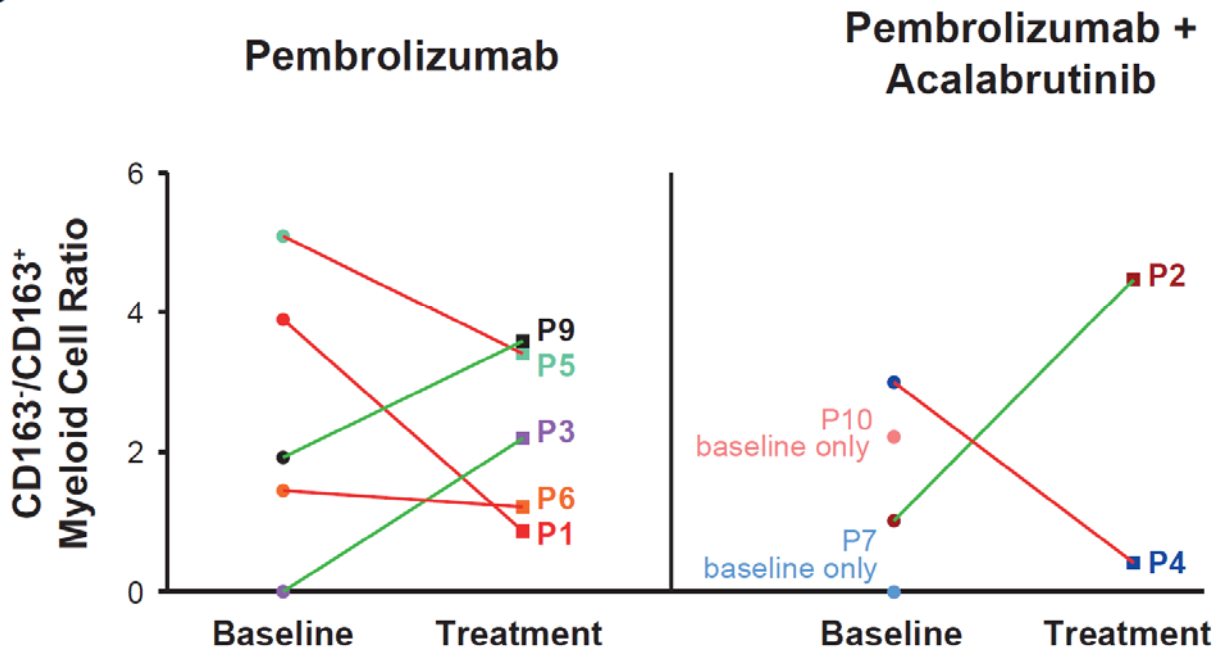

D

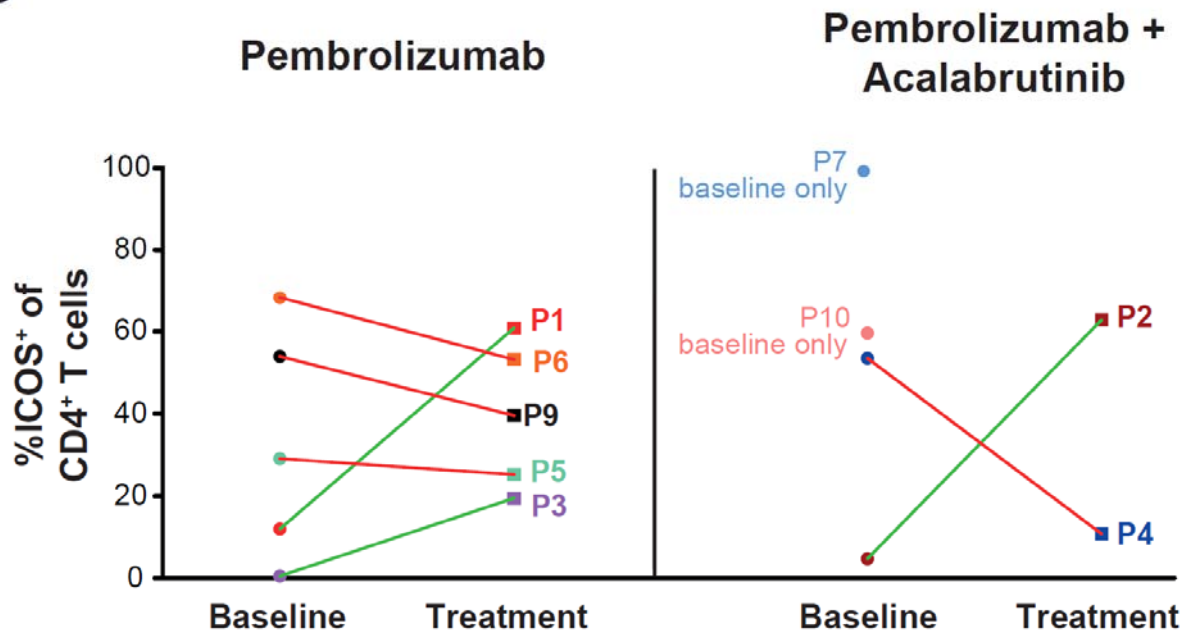

Supplement: ccr-21-2547_figure_s3_supps3.pdf [file ccr-21-2547_figure_s3_supps3.pdf]
