# Supplementary material
Source: PubMed Central journal article supplement (PMC9377750)
Supplement: ccr-21-2547_supplementary_data_supp0.pdf [file ccr-21-2547_supplementary_data_supp0.pdf]

## **Supplementary Appendix**

Supplement to: Taylor M, Betts CB, Maloney L, Nadler E, Algazi A, Guarino MJ, et al. Safety and Efficacy of Pembrolizumab in Combination With Acalabrutinib in Advanced Head and Neck Squamous Cell Carcinoma: Phase 2 Proof-of-Concept Study.

## **SUPPLEMENTAL METHODS**

### **Dose-limiting Toxicities (DLT)**

A DLT was defined as the occurrence of any of the following study drug–related adverse events (AEs):

- Grade 4 vomiting or diarrhea
- Grade 3 nausea, vomiting, or diarrhea lasting for over 72 hours
- Other grade  $\geq 3$  toxicities (transient grade 3–4 laboratory abnormalities that were not clinically significant were not considered DLTs)
- Dosing delay due to toxicity for more than 21 consecutive days

AEs clearly related to disease progression or the subject’s current medical history and associated comorbidities were not considered DLTs.

### **Serious AEs**

An AE was considered serious if it met one of the following criteria:

- It resulted in death
- It was life-threatening
- It required or prolonged hospitalization
- It resulted in persistent or significant disability or incapacity
- It resulted in a congenital anomaly or birth defect in a neonate/infant born to a mother exposed to the study drug
- It was considered a significant medical event by the investigator based on medical judgment

## SUPPLEMENTAL TABLES

**Table S1. Antibody Panels Used in mIHC for Assessment of Tumor Immune Microenvironment.** Antibody panels focused on lymphoid, myeloid, and functional assessment were utilized in a cyclic immunohistochemistry platform. AEC, aminoethyl carbazole; O/N, overnight; ms, mouse; rbt, rabbit; RT, room temperature.

| Lymphoid Panel   |                     |                  |            |            |             |            |        |
|------------------|---------------------|------------------|------------|------------|-------------|------------|--------|
| Cycle            | Primary antibody    | Clone/ Product # | Dilution   | Reaction   | Histofine   | Reaction   | AEC    |
| 1                | Hematoxylin         | Dako             | Original   | 1 min      |             |            |        |
| 2                | Ms anti PD1         | NAT105           | 1/50       | RT, 30 min | Anti-mouse  | RT, 30 min | 20 min |
| 3                | Rbt anti CD3        | SP7              | 1/150      | RT, 30 min | Anti-rabbit | RT, 30 min | 20 min |
| 4                | Ms anti RORyt       | 6F3.1            | 1/200      | RT, 30 min | Anti-mouse  | RT, 30 min | 10 min |
| 5                | Ms anti NKp46       | 195314           | 1/20       | 4°C, O/N   | Anti-mouse  | RT, 30 min | 20 min |
| 6                | Ms anti CD8         | C8/144B          | 1/100      | RT, 30 min | Anti-mouse  | RT, 30 min | 20 min |
| 7                | Rbt anti T-bet      | sc-21003         | 1/100      | RT, 30 min | Anti-rabbit | RT, 30 min | 20 min |
| 8                | Ms anti GATA-3      | L50-823          | 1/100      | RT, 30 min | Anti-mouse  | RT, 30 min | 40 min |
| 9                | Rbt anti PDL1       | E1L3N            | 1/100      | RT, 60 min | Anti-rabbit | RT, 30 min | 40 min |
| 10               | Ms anti CD45        | H130             | 1/100      | RT, 30 min | Anti-mouse  | RT, 30 min | 20 min |
| 11               | Ms anti Foxp3       | 236A/E7          | 1/40       | RT, 30 min | Anti-mouse  | RT, 30 min | 20 min |
| 12               | Ms anti CD20        | O.N.85           | 1/1000     | RT, 30 min | Anti-mouse  | RT, 30 min | 20 min |
| 13               | Rbt anti BTK        | D3H5             | 1/100      | RT, 30 min | Anti-rabbit | RT, 30 min | 30 min |
| 14               | Ms anti p16         | E6H4             | Prediluted | RT, 30 min | Anti-mouse  | RT, 30 min | 20 min |
| Myeloid Panel    |                     |                  |            |            |             |            |        |
| Cycle            | Primary antibody    | Clone/ Product # | Dilution   | Reaction   | Histofine   | Reaction   | AEC    |
| 1                | Hematoxylin         | Dako             | Original   | 1 min      |             |            |        |
| 2                | Rbt anti-CSF1R      | SP211            | 1/150      | RT, 30 min | Anti-rabbit | RT, 30 min | 20 min |
| 3                | Ms anti PD1         | NAT105           | 1/50       | RT, 30 min | Anti-mouse  | RT, 30 min | 20 min |
| 4                | Ms anti CD68        | PG-M1            | 1/50       | RT, 30 min | Anti-mouse  | RT, 30 min | 20 min |
| 5                | Ms anti DC-SIGN     | DC-28            | 1/100      | RT, 30 min | Anti-mouse  | RT, 30 min | 20 min |
| 6                | Rat anti DC-LAMP    | 1010E1.01        | 1/100      | RT, 30 min | Anti-rat    | RT, 30 min | 30 min |
| 7                | Ms anti CD66b       | G10F5            | 1/600      | RT, 30 min | Anti-mouse  | RT, 30 min | 20 min |
| 8                | Rbt anti MHC II     | EPR11226         | 1/5000     | RT, 30 min | Anti-rabbit | RT, 30 min | 20 min |
| 9                | Ms anti CD163       | 10D6             | 1/100      | RT, 30 min | Anti-mouse  | RT, 30 min | 20 min |
| 10               | Rbt anti PDL1       | E1L3N            | 1/100      | 4°C, O/N   | Anti-rabbit | RT, 30 min | 40 min |
| 11               | Ms anti CD45        | H130             | 1/100      | RT, 30 min | Anti-mouse  | RT, 30 min | 20 min |
| 12               | CD3/20/NKp46*       | *                | *          | RT, 30 min | **          | RT, 30 min | 20 min |
| 13               | Ms anti Tryptase    | AA1              | 1/20,000   | RT, 30 min | Anti-mouse  | RT, 30 min | 20 min |
| 14               | Rbt anti BTK        | D3H5             | 1/100      | RT, 30 min | Anti-rabbit | RT, 30 min | 30 min |
| 15               | Ms anti p16         | E6H4             | Prediluted | RT, 30 min | Anti-mouse  | RT, 30 min | 20 min |
| Functional Panel |                     |                  |            |            |             |            |        |
| Cycle            | Primary antibody    | Clone/ Product # | Dilution   | Reaction   | Histofine   | Reaction   | AEC    |
| 1                | Hematoxylin         | Dako             | Original   | 1 min      |             |            |        |
| 2                | Ms anti CD4         | 4B12             | 1/25       | RT, 30 min | Anti-mouse  | RT, 30 min | 40 min |
| 3                | Rbt anti CD3        | SP7              | 1/150      | RT, 30 min | Anti-rabbit | RT, 30 min | 20 min |
| 4                | Ms anti PD1         | NAT105           | 1/50       | RT, 30 min | Anti-mouse  | RT, 30 min | 40 min |
| 5                | Rbt anti Ki67       | SP6              | 1/500      | RT, 30 min | Anti-rabbit | RT, 30 min | 20 min |
| 6                | Ms anti CD8         | C8/144B          | 1/50       | RT, 30 min | Anti-mouse  | RT, 30 min | 20 min |
| 7                | Ms anti CD45        | H130             | 1/50       | RT, 30 min | Anti-mouse  | RT, 30 min | 40 min |
| 8                | Rbt anti EOMES      | AB2283           | 1/1000     | RT, 30 min | Anti-rabbit | RT, 30 min | 20 min |
| 9                | Rbt anti ICOS       | SP98             | 1/100      | RT, 30 min | Anti-rabbit | RT, 30 min | 40 min |
| 10               | Ms anti CD68        | PG-M1            | 1/50       | RT, 30 min | Anti-mouse  | RT, 30 min | 20 min |
| 11               | Rbt anti Granzyme B | EP230            | 1/100      | RT, 30 min | Anti-rabbit | RT, 30 min | 20 min |

\*CD3(SP7):1/150, CD20(O.N.85):1/1,000, NKp46(195314):1/20.  
 \*\*Anti-mouse for 30 min & anti-rabbit for 30 min.

**Table S2. Tissue Area Assessed in Baseline and On-Treatment Patient Biopsies by Multiplex Immunohistochemistry.** On-treatment biopsies were collected 43 days after starting treatment. Cohort averages are reported in the bottom row. Patients P1, P3, P5, P6, and P9 received pembrolizumab monotherapy. Patients P2, P4, P7, and P10 received pembrolizumab plus acalabrutinib combination therapy. Rx, on treatment.

| Patient ID              | Biopsy type | Total area assessed                                                               | % biopsy tissue assessed |
|-------------------------|-------------|-----------------------------------------------------------------------------------|--------------------------|
| P1                      | Baseline    | 17775273 $\mu\text{m}^2$                                                          | 35.2%                    |
|                         | Rx          | 3212457 $\mu\text{m}^2$                                                           | 40.0%                    |
| P2                      | Baseline    | 93871509 $\mu\text{m}^2$                                                          | 22.4%                    |
|                         | Rx          | 8234708 $\mu\text{m}^2$                                                           | 40.5%                    |
| P3                      | Baseline    | 4055441 $\mu\text{m}^2$                                                           | 12.9%                    |
|                         | Rx          | 594248 $\mu\text{m}^2$                                                            | 16.8%                    |
| P4                      | Baseline    | 464850 $\mu\text{m}^2$                                                            | 61.7%                    |
|                         | Rx          | 615190 $\mu\text{m}^2$                                                            | 100%                     |
| P5                      | Baseline    | 2215000 $\mu\text{m}^2$                                                           | 67.9%                    |
|                         | Rx          | 1857157 $\mu\text{m}^2$                                                           | 15.1%                    |
| P6                      | Baseline    | 7865899 $\mu\text{m}^2$                                                           | 69.0%                    |
|                         | Rx          | 4642918 $\mu\text{m}^2$                                                           | 70.1%                    |
| P7                      | Baseline    | 5130340 $\mu\text{m}^2$                                                           | 67.5%                    |
|                         | Rx          | -                                                                                 | -                        |
| P9                      | Baseline    | 2927323 $\mu\text{m}^2$                                                           | 55.4%                    |
|                         | Rx          | 7990285 $\mu\text{m}^2$                                                           | 90.3%                    |
| P10                     | Baseline    | 1105928 $\mu\text{m}^2$                                                           | 100%                     |
|                         | Rx          | -                                                                                 | -                        |
| <b>COHORT AVERAGES:</b> |             | <b>10,159,568 <math>\mu\text{m}^2</math><br/>(10.16 <math>\text{mm}^2</math>)</b> | <b>51.2%</b>             |
