# Supplementary material
Source: PubMed Central journal article supplement (PMC9377750)

**Figure S2. Patient Disposition.**

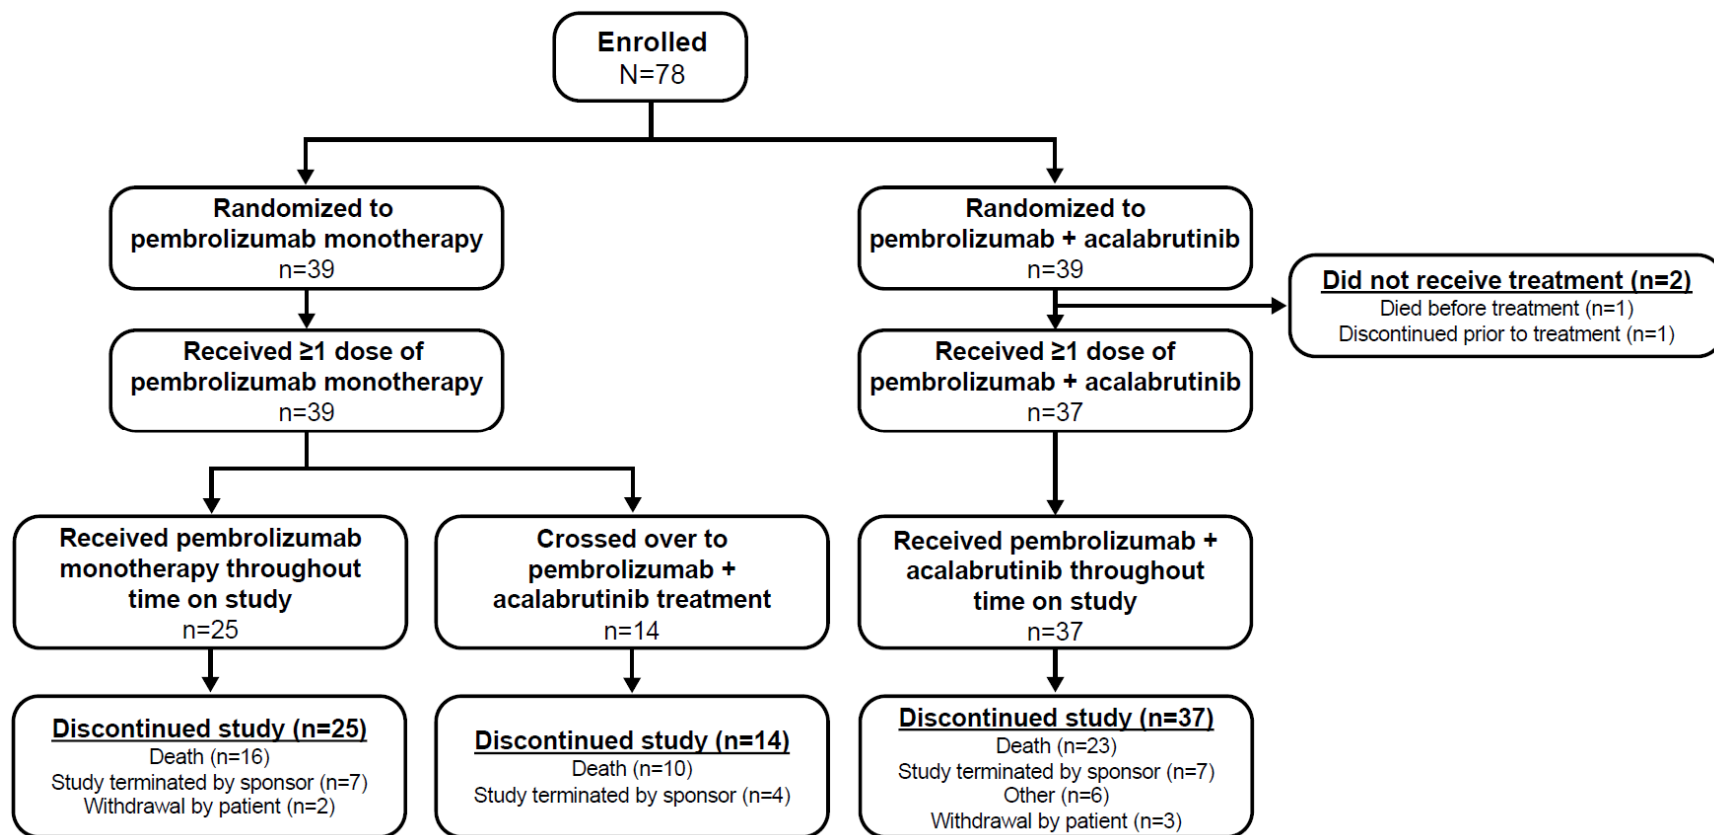

Supplement: ccr-21-2547_figure_s2_supps2.pdf [file ccr-21-2547_figure_s2_supps2.pdf]
